# Supplementary material
Source: PubMed Central journal article supplement (PMC2853800)
Supplement: NIHMS191616-supplement-01.pdf [file NIHMS191616-supplement-01.pdf]

## SUPPLEMENTARY ONLINE MATERIAL

SOM1. Supplementary online material (SOM2) from Morin, L.P. and Studholme, K.M.

Millisecond light stimuli evoke cessation of locomotion followed by sleep-like behavior that persists in the absence of light. J. Biol. Rhythms.

SOM2. Edited movie of a mouse videotaped under infrared illumination and exposed to 10 flashes of 2 msec light equally spaced across 5 min. Taping began shortly before the initial flash and continued until the animal resumed wheelrunning. This individual was one of two that received light stimulation while running. It ceased running very quickly, the period of quiescence lasting 8.3 min, at which point the mouse assumed a sleep posture that endured an additional 18.7 min for a total wheelrunning suppression interval of 27 min. The video clip has been edited down to about 1.3 min in order to provide a sense of the behavioral changes that follow the millisecond light stimuli.
